# Supplementary material
Source: Springer Nature journal article supplement (https://www.springermedizin.de/resource/supplementary/12889_2014_6398_MOESM6_ESM.pdf/9497834)
Supplement: MOESM6 [file 9497834]

**I MOVE****ACTIVE PLUS****CONTROL**

Baseline

Questionnaire 1

Session 1

Advice 1

3 weeks

Session 2

Advice 2

6 weeks

Questionnaire A

Questionnaire A

Session 3

Advice 3

3 months

Questionnaire 2

Session 4

Advice 4

6 months

Questionnaire 3

12 months

Questionnaire 4
